# Supplementary material for: Sequential release of drugs from hollow manganese ferrite nanocarriers for breast cancer therapy
Source: Royal Society of Chemistry journal article supplement (doi:10.1039/c4tb01098a), 2014-10-06
Supplement: c4tb01098a1.pdf [file c4tb01098a1.pdf]

## Sequential release of drugs from Hollow Manganese Ferrate nanocarriers for Breast cancer therapy

**B. N. Prashanth Kumar,<sup>a</sup> Nagaprasad Puvvada,<sup>b,d</sup> Shashi Rajput,<sup>a</sup> Siddik Sarkar,<sup>c</sup> Swadesh K. Das,<sup>c</sup> Luni Emdad,<sup>c</sup> Devanand Sarkar,<sup>c</sup> P. Venkatesan,<sup>a</sup> Ipsita Pal,<sup>a</sup> Goutam Dey,<sup>a</sup> Suraj Konar,<sup>b</sup> Keith R. Brunt,<sup>d</sup> Raj R Rao,<sup>e</sup> Abhijit Mazumdar,<sup>f</sup> Subhas C. Kundu,<sup>g,\*</sup> Amita Pathak,<sup>b,\*\*</sup> Paul B. Fisher,<sup>c</sup> and Mahitosh Mandal,<sup>a,\*\*\*</sup>**

*Received (in XXX, XXX) Xth XXXXXXXXXX 20XX, Accepted Xth XXXXXXXXXX 20XX*

DOI: 10.1039/b000000x

### Tables

Table 1: List of some representative tamoxifen and diosgenin based nanocarriers

| Nanoparticles                                                                            | Morphology                                | Drugs                   | Findings                                                                | References |
|------------------------------------------------------------------------------------------|-------------------------------------------|-------------------------|-------------------------------------------------------------------------|------------|
| Magnetite nanoparticles (Fe <sub>3</sub> O <sub>4</sub> )/ poly(l-lactic acid) composite | Spherical (200 nm)                        | Tamoxifen               | Enhanced cellular uptake and induced cytotoxic effects                  | [60]       |
| Nanogels Crosslinked by Functional Superparamagnetic Maghemite Nanoparticles             | Spherical (80 nm)                         | Tamoxifen               | Thermo responsive mediated drug delivery                                | [61]       |
| Manganese superoxide dismutase                                                           | Spherical (130 nm)                        | Tamoxifen               | Reactive oxygen species induced apoptosis                               | [62]       |
| Graphene                                                                                 | Multi walled enlogated shapes (50-150 nm) | Tamoxifen               | Induced apoptosis                                                       | [63]       |
| Cyclodextrin-based nanosponges                                                           | Nanosponges (400-600 nm)                  | Tamoxifen               | Oral delivery, Cytotoxic effects                                        | [64]       |
| Diacyllipid-Polymer Micelles                                                             | Nanomicells (10 to 40 nm)                 | Tamoxifen               | Drug delivery occurs through enhanced permeability and retention effect | [65]       |
| PEGylated magnetic nanoparticles                                                         | Spherical (40 nm)                         | Tamoxifen               | Improved anticancer activity                                            | [66]       |
| Chitosan nanoparticles                                                                   | Spherical (30-60 nm)                      | Diosgenin               | Drug release studies                                                    | [67]       |
| Silica nanoparticles                                                                     | Spherical (180 nm)                        | Diosgenin               | Extraction of Diosgenin from crude*                                     | [68]       |
| Hollow MnFe <sub>2</sub> O <sub>4</sub> nanocarriers                                     | Octahedron shape (110-220 nm)             | Tamoxifen and diosgenin | Increased magnetic saturation along with apoptosis                      | This study |

\*Not employed in cancer therapy.

## Synthesis of hollow $\text{MnFe}_2\text{O}_4$ nanocarriers

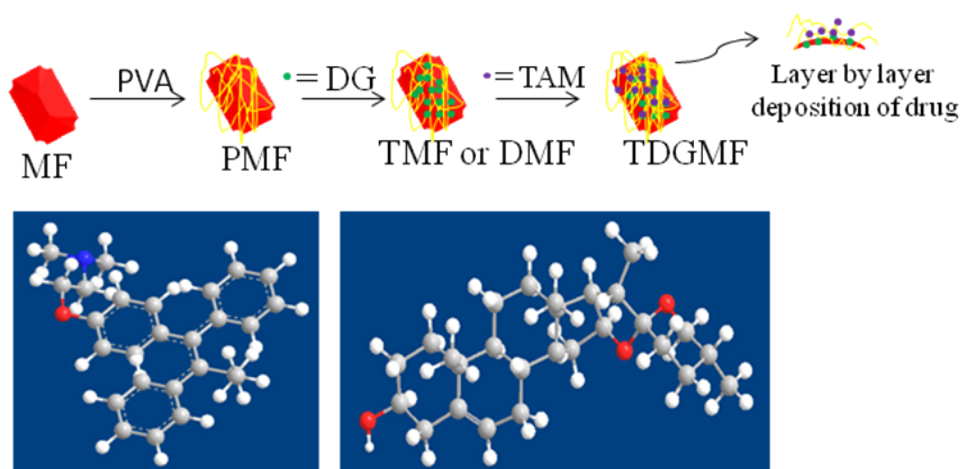

**Scheme1:** Schematic representation for the MF surface coated with PVA followed by encapsulation of TAM or DG or both are deposited by layer by layer and corresponding TAM and DG structures

## XRD and FTIR Analysis

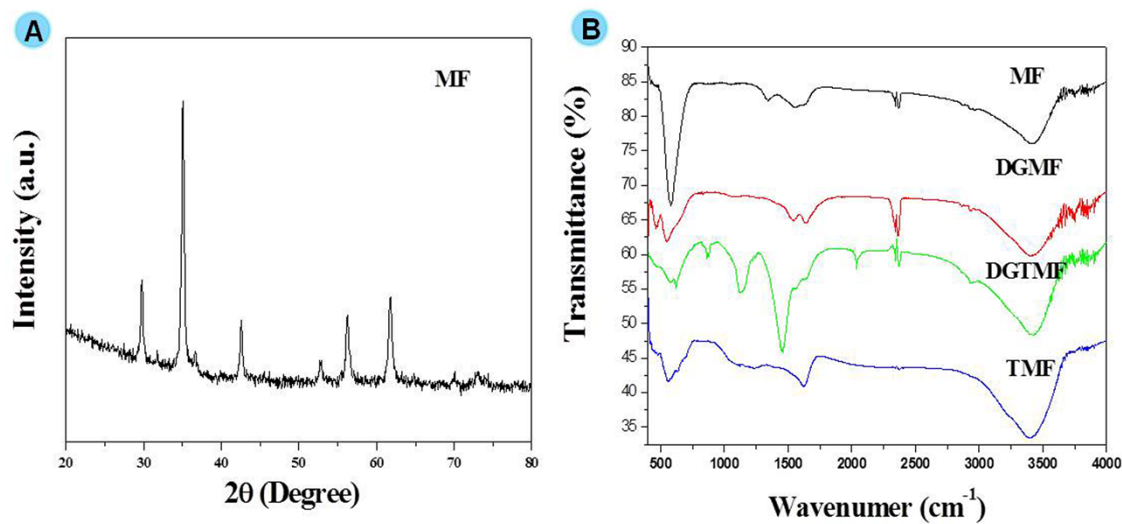

**Figure S1:** (A)XRD Pattern of hollow MF (B) FTIR spectra of MF, DGMF, DGTMF and TMF.

## Drug release studies

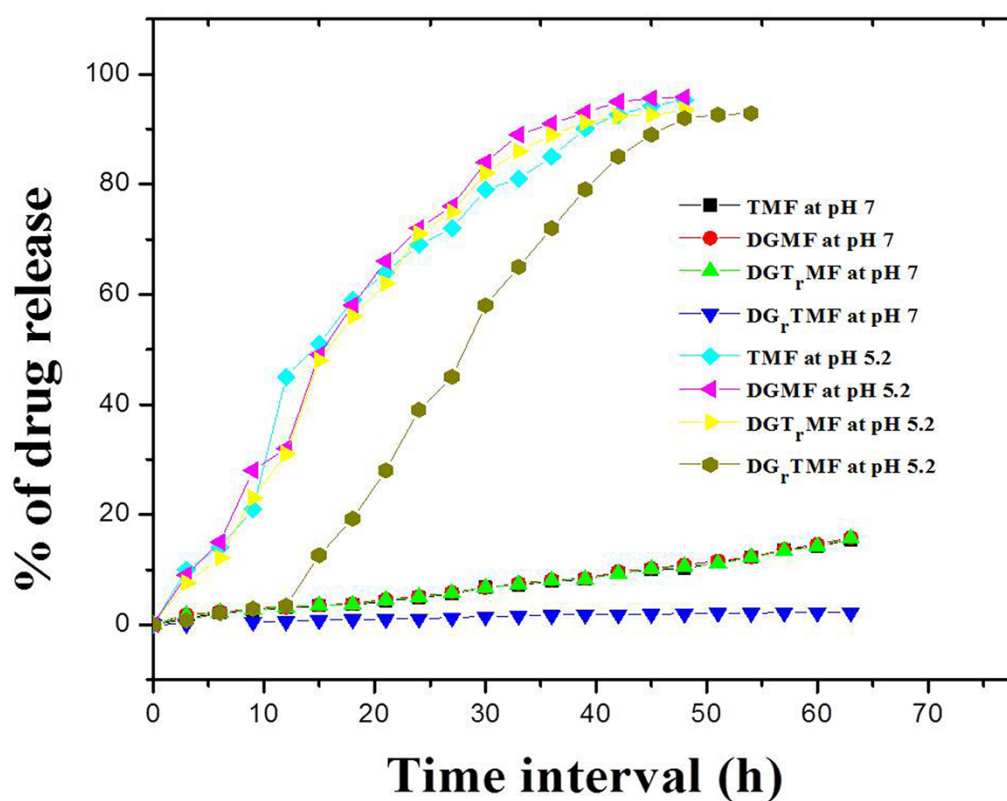

**Figure S2:** Drug release from samples at pH 7 and 5.2 for TMF, DGMF, DGTMF (Where T<sub>r</sub> and DG<sub>r</sub> corresponds to TAM and DG release from DGTMF sample, respectively).

## Cellular uptake of drug loaded nanocarriers

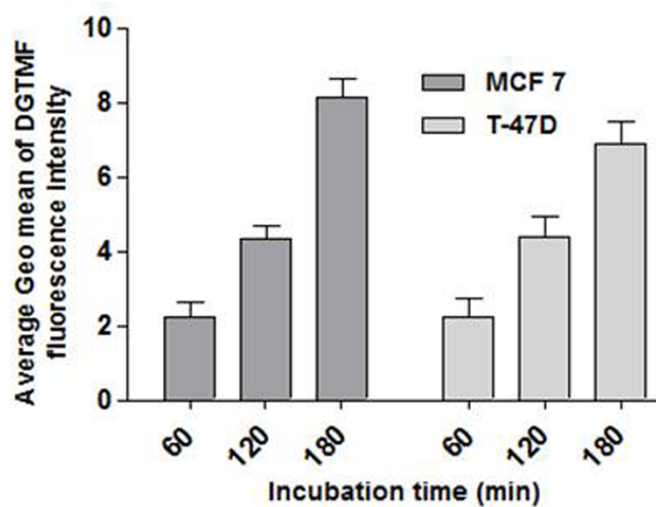

**Figure S3:** Geometric mean analysis of DGTMF cellular uptake through flow cytometry in MCF 7 and T-47D cells. Mean±SD are shown.

## Cell cycle analysis

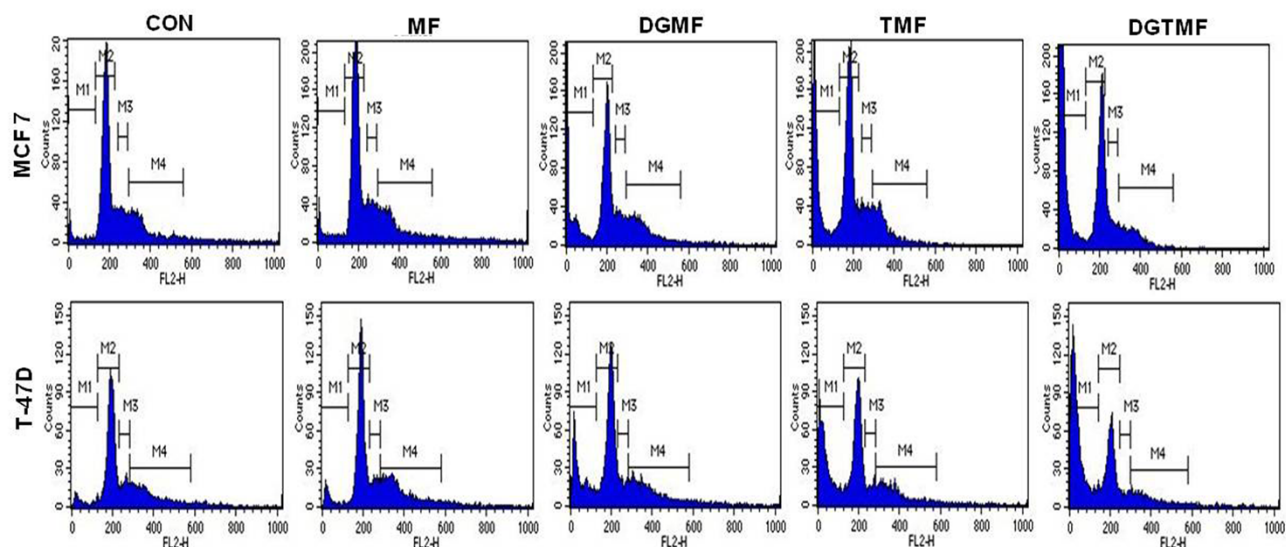

**Figure S4:** Apoptotic activity of different drug loaded nanoparticles on MCF 7 and T-47D cells by flow cytometry phase distribution study

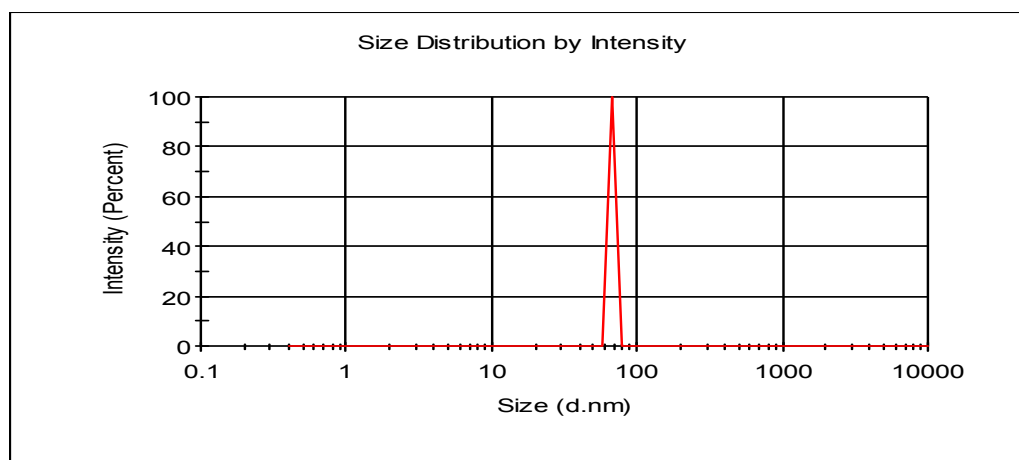

**Figure S5:** DLS measurement of TDGMF sample in cyclohexane (~ 62 nm)

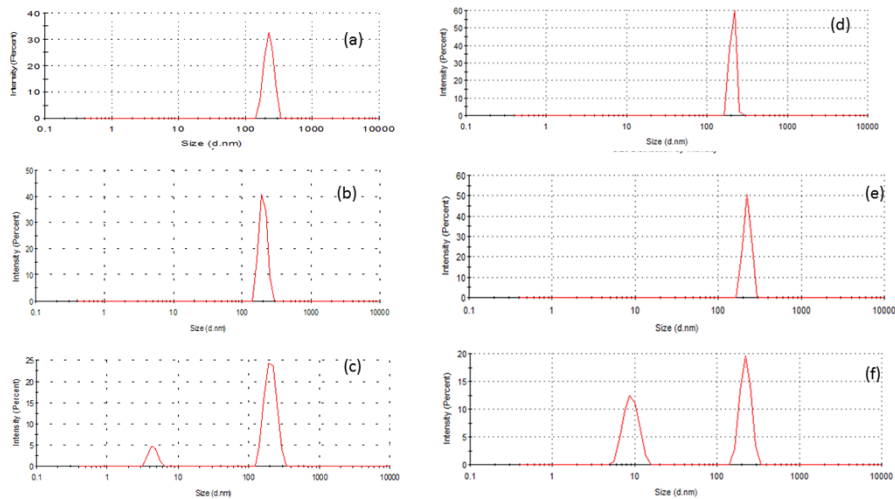

**Figure S6:** DLS measurement of TDGMF sample in flow mode (a-c) and normal mode (e-f). where (a & d) measured in PBS solution, (b and e) cell culture media and (c and f) protein media (less than 10 nm peak in c and f are due to presence of protein molecules).

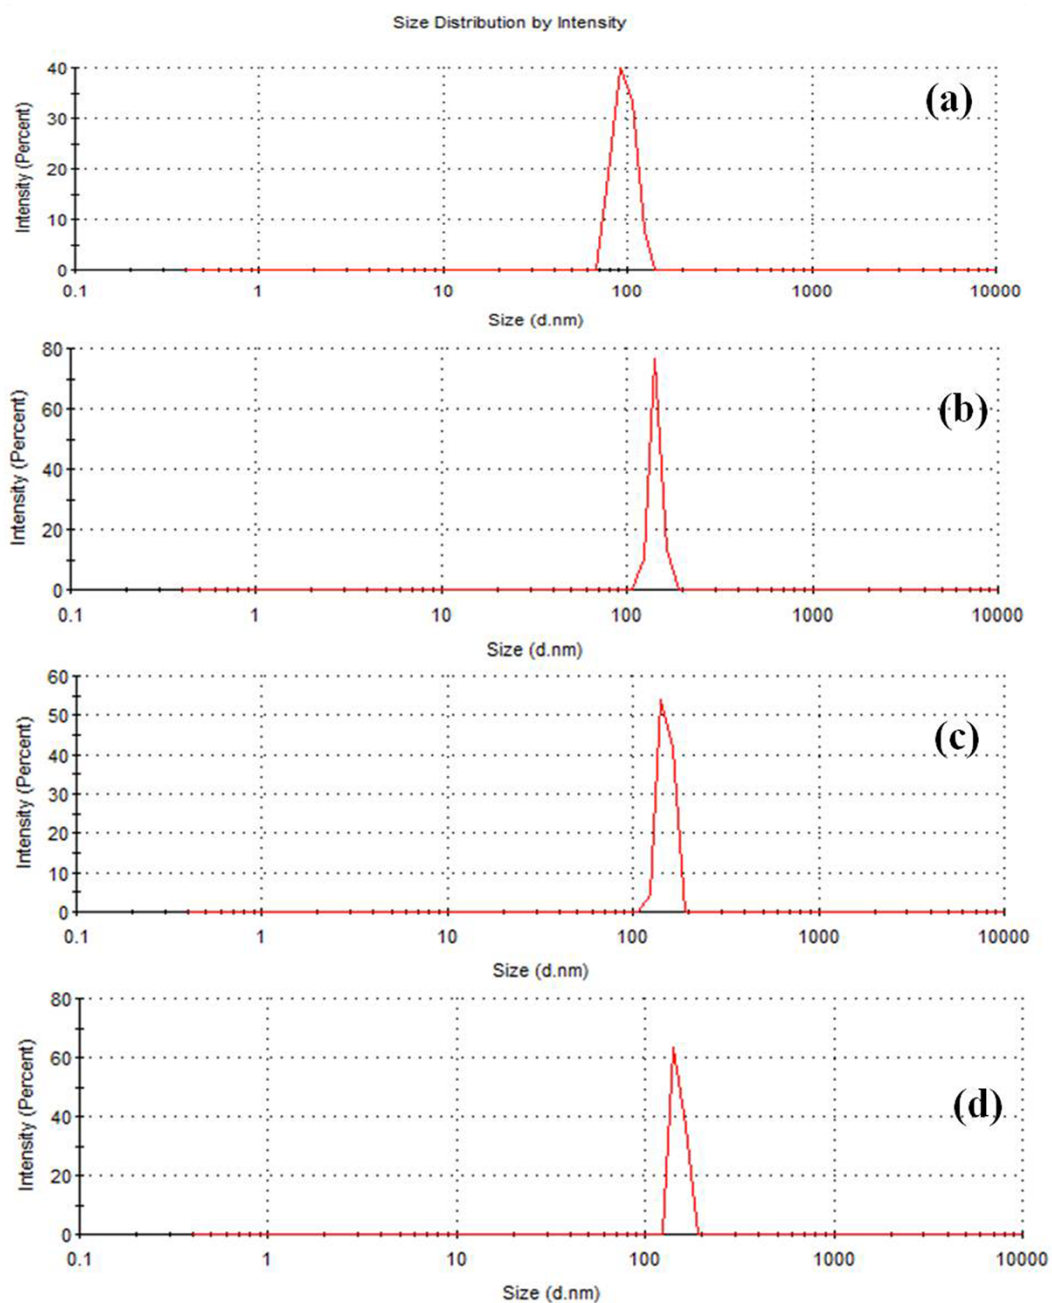

**Figure S7:** DLS measurement of (a) MF, (b) DGMF, (c) TMF and (d)DGTMF through flow cell method.
